# Supplementary material
Source: MDPI journal article supplement (https://www.mdpi.com/2311-7524/8/1/81)
Supplement: s1 [file s1 › horticulturae-1532591-supplementary.pdf]

## Article

# Supplementary Materials: Cluster-Zone Leaf Removal and GA<sub>3</sub> Application at Early Flowering Reduce Bunch Compactness and Yield per Vine in *Vitis vinifera* cv. Pinot Gris

Mario Wegher, Michele Faralli and Massimo Bertamini

**Table S1.** Phenological stage onset for both the field site.

| Fra gli Adigi |                                     |                             |
|---------------|-------------------------------------|-----------------------------|
| Date          | BBCH Stage                          | Applied Measure             |
| 09.04.2020    | 09 – Bud burst                      |                             |
| 14.04.2020    | 13 – 3 leaves unfolded              |                             |
| 19.04.2020    | 15 – 5 leaves unfolded              |                             |
| 24.04.2020    | 53 – Inflorescences clearly visible |                             |
| 09.05.2020    | 55 – Inflorescences swelling        |                             |
| 16.05.2020    | 57 – Inflorescences fully developed |                             |
| 18.05.2020    | 60 – First flowerhoods detach       |                             |
| 19.05.2020    | 61 – Beginning of flowering         |                             |
| 20.05.2020    | 62 – 20% of flowerhoods fallen      | Leaf removal                |
| 20.05.2020    | 63 – Early flowering                |                             |
| 21.05.2020    | 65 – Full flowering                 | GA <sub>3</sub> application |
| 28.05.2020    | 71 – Fruit set                      |                             |
| 27.07.2020    | 81 - Véraison                       |                             |
| 31.08.2020    | 89 - Harvest                        |                             |

  

| Puncli     |                                     |                             |
|------------|-------------------------------------|-----------------------------|
| Date       | BBCH Stage                          | Applied Measure             |
| 11.04.2020 | 09 – Bud burst                      |                             |
| 17.04.2020 | 13 – 3 leaves unfolded              |                             |
| 21.04.2020 | 15 – 5 leaves unfolded              |                             |
| 27.04.2020 | 53 – Inflorescences clearly visible |                             |
| 09.05.2020 | 55 – Inflorescences swelling        |                             |
| 16.05.2020 | 57 – Inflorescences fully developed |                             |
| 18.05.2020 | 60 – First flowerhoods detach       |                             |
| 19.05.2020 | 61 – Beginning of flowering         |                             |
| 20.05.2020 | 62 – 20% of flowerhoods fallen      | Leaf removal                |
| 20.05.2020 | 63 – Early flowering                |                             |
| 21.05.2020 | 65 – Full flowering                 | GA <sub>3</sub> application |
| 29.05.2020 | 71 – Fruit set                      |                             |
| 24.07.2020 | 81 - Véraison                       |                             |
| 31.08.2020 | 89 - Harvest                        |                             |

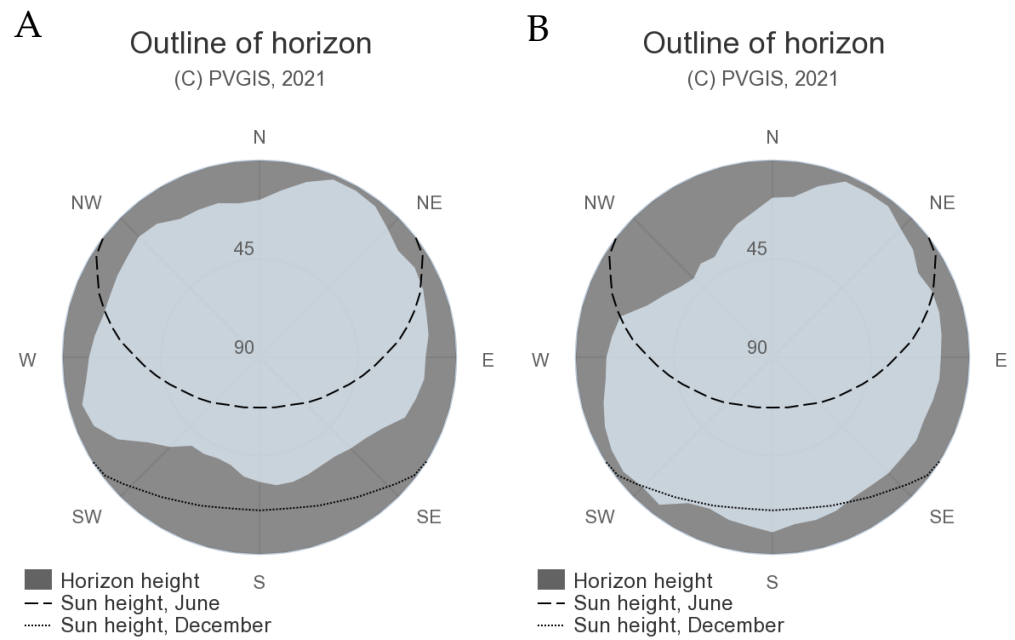

**Figure S1.** Outline of horizon for FGA (A) and PC (B). Data from the European Photovoltaic Geographical Information System (PVGIS).

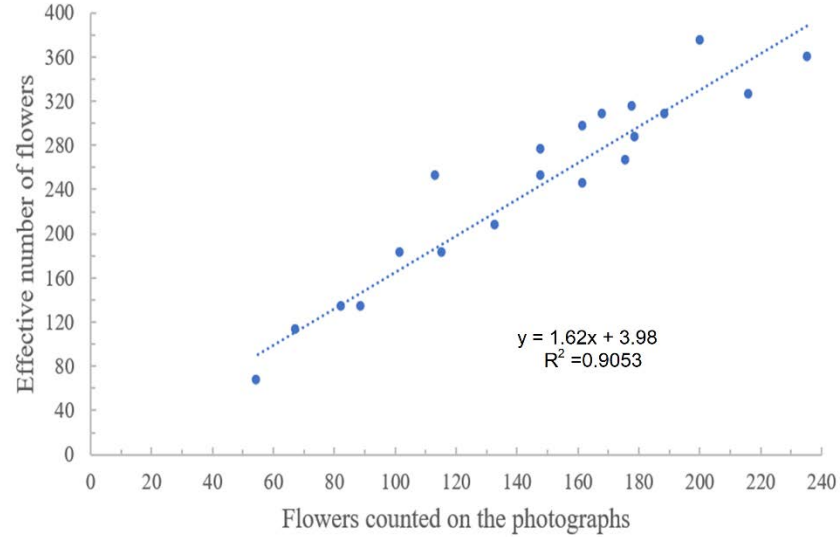

**Figure S2.** Relationship between flower number counted via visual observation (y) and flower counted via RGB imaging (x). Points are raw data (n=15) and curve fitting was performed via linear regression.
